# Supplementary material for: Tools used to assess the quality of peer review reports: a methodological systematic review
Source: PubMed Central journal article supplement (PMC6402095; doi:10.1186/s12874-019-0688-x), 2019-03-06
Supplement: 12874_2019_688_MOESM1_ESM.pdf [file 12874_2019_688_MOESM1_ESM.pdf]

## Additional file 1. Search strategy

**Pubmed (n=2474)** (last search: October 27, 2017)

("Peer Review, Research/methods"[Majr] OR "Peer Review, Research/standards"[Majr] OR "Peer Review /methods"[Majr] OR "Peer Review /standards"[Majr] OR peer review\*[tiab]) AND (manuscript\*[tiab] OR article\*[tiab] OR publication\*[tiab] OR report[tiab] OR reports[tiab] OR submission\*[tiab] OR review\*[tiab]) AND ("Quality Control"[Mesh] OR quality[ti] OR validity[ti] OR measure\*[ti] OR instrument\*[ti] OR scale\*[ti] OR score\*[ti] OR assessment\*[ti] OR apprais\*[ti] OR tool[ti])

**Cochrane Library (n=340)** (last search: October 27, 2017)

ID Search

- #1 MeSH descriptor: [Peer Review, Research] explode all trees and with qualifier(s): [Methods - MT]
- #2 MeSH descriptor: [Peer Review, Research] explode all trees and with qualifier(s): [Standards - ST]
- #3 MeSH descriptor: [Peer Review] explode all trees and with qualifier(s): [Methods - MT]
- #4 MeSH descriptor: [Peer Review] explode all trees and with qualifier(s): [Standards - ST]
- #5 "peer review\*":ti,ab,kw (Word variations have been searched)
- #6 #1 or #2 or #3 or #4 or #5
- #7 "manuscript\*":ti,ab,kw (Word variations have been searched)
- #8 "article\*":ti,ab,kw (Word variations have been searched)
- #9 "publication\*":ti,ab,kw (Word variations have been searched)
- #10 "report":ti,ab,kw (Word variations have been searched)
- #11 reports:ti,ab,kw (Word variations have been searched)
- #12 "submission\*":ti,ab,kw (Word variations have been searched)
- #13 "review\*":ti,ab,kw (Word variations have been searched)
- #14 #7 or #8 or #9 or #10 or #11 or #12 or #13
- #15 MeSH descriptor: [Quality Control] explode all trees
- #16 "quality":ti (Word variations have been searched)
- #17 "validity":ti (Word variations have been searched)
- #18 "measure\*":ti (Word variations have been searched)
- #19 "instrument\*":ti (Word variations have been searched)
- #20 "scale\*":ti (Word variations have been searched)
- #21 "score\*":ti (Word variations have been searched)
- #22 "assessment\*":ti (Word variations have been searched)
- #23 "apprais\*":ti (Word variations have been searched)
- #24 "tool":ti (Word variations have been searched)
- #25 #15 or #16 or #17 or #18 or #19 or #20 or #21 or #22 or #23 or #24
- #26 #6 and #14 and #25

**EMBASE (n=3698)** (last search: October 27, 2017)

('peer review'/exp OR 'peer review\*') AND ('methodology'/exp OR 'research'/exp OR 'standards'/exp) AND (manuscript\*:ab,ti OR article\*:ab,ti OR publication\*:ab,ti OR report:ab,ti OR reports:ab,ti OR submission\*:ab,ti OR review\*:ab,ti) AND ('quality control'/exp OR quality:ti OR validity:ti OR measure\*:ti OR instrument\*:ti OR scale\*:ti OR score\*:ti OR assessment\*:ti OR apprais\*:ti OR tool:ti) AND [embase]/lim

**Google® Search** (last search: October 20, 2017)

It was conducted using the following terms: peer review, report and quality. The first 200 links were investigated.
