# Supplementary material for: Tools used to assess the quality of peer review reports: a methodological systematic review
Source: PubMed Central journal article supplement (PMC6402095; doi:10.1186/s12874-019-0688-x), 2019-03-06
Supplement: 12874_2019_688_MOESM2_ESM.pdf [file 12874_2019_688_MOESM2_ESM.pdf]

## Additional file 2. Excluded studies and reasons for exclusion (n=34)

| References*                                                                                                                                                                                                                                                                                                                                   | Reasons for exclusion                                                                              |
|-----------------------------------------------------------------------------------------------------------------------------------------------------------------------------------------------------------------------------------------------------------------------------------------------------------------------------------------------|----------------------------------------------------------------------------------------------------|
| 1. Ammenwerth E, Knaup P, Ulmer H, Wolff AC, Haux R. Developing and evaluating criteria to help reviewers of biomedical informatics manuscripts. <i>Informatik Biometrie und Epidemiologie in Medizin und Biologie</i> . 2003;10(5):512-14.                                                                                                   | <b>No tool of interest</b><br>(Criteria for reviewers to support an objective high-quality review) |
| 2. Baxt WG, Waeckerle JF, Berlin JA, Callaham ML. Who reviews the reviewers? Feasibility of using a fictitious manuscript to evaluate peer reviewer performance. <i>Annals of emergency medicine</i> . 1998;32(3):310-7.                                                                                                                      | <b>No tool of interest</b><br>(Number of errors oppositely introduced by the editors)              |
| 3. Blank RM. The effects of double-blind versus single-blind reviewing: Experimental evidence from the American Economic Review. <i>The American Economic Review</i> . 1991;81(5):1041-67.                                                                                                                                                    | <b>No outcome of interest</b><br>(Paper acceptance rate)                                           |
| 4. Bornmann L, Daniel HD. Do author-suggested reviewers rate submissions more favorably than editor-suggested reviewers? a study on atmospheric chemistry and physics. <i>PLoS ONE</i> . 2010;5(10):1-8.                                                                                                                                      | <b>No tool of interest</b><br>(Assessment of manuscript)                                           |
| 5. Callaham M. Training of peer reviewers: validation of a 5-point rating scale. <i>PLoS medicine</i> . 2007;4:e166.                                                                                                                                                                                                                          | <b>Type of reference</b><br>(Note of the author to his published manuscript)                       |
| 6. Cohen IT, Patel K. Peer review interrater concordance of scientific abstracts: A study of anesthesiology subspecialty and component societies. <i>Anesthesia and Analgesia</i> . 2006;102(5):1501-3.                                                                                                                                       | <b>No tool of interest</b><br>(Assessment of abstract)                                             |
| 7. Cummings P. Effects of differences between peer reviewers suggested by authors and by editors. <i>JAMA</i> . 2006;296(10):1231-2.                                                                                                                                                                                                          | <b>No tool involved</b>                                                                            |
| 8. Das Sinha S, Sahni P, Nundy S. The effect of informing referees that their comments would be exchanged on the quality of their reviews (abstract) [Internet]. 1997 Available from: <a href="https://peerreviewcongress.org/abstracts_1997.html#review">https://peerreviewcongress.org/abstracts_1997.html#review</a>                       | <b>Abstract of an included study</b>                                                               |
| 9. EaEarnshaw JJ, Farndon JR, Guillou PJ, Johnson CD, Murie JA, Murray GD. A comparison of reports from referees chosen by authors or journal editors in the peer review process. <i>Annals of the Royal College of Surgeons of England</i> . 2000;82(4 Suppl):133-5.                                                                         | <b>No tool of interest</b><br>(Assessment of manuscript)                                           |
| 10. Fisher M, Friedman SB, Strauss B. The effects of blinding on acceptance of research papers by peer review. <i>Journal of the American Medical Association</i> . 1994;272(2):143-6.                                                                                                                                                        | <b>No tool of interest</b><br>(Assessment of manuscript)                                           |
| 11. Godlee F, Gale CR, Martyn CN. Effect on the quality of peer review of blinding reviewers and asking them to sign their reports: a randomized controlled trial. <i>JAMA</i> . 1998;280(3):237-40.                                                                                                                                          | <b>No tool of interest</b><br>(Number of weaknesses oppositely introduced by the editors)          |
| 12. Godlee F, Gale CR, Martyn CN. The effect on the quality of peer review of blinding reviewers and asking them to sign their reports: a randomized controlled trial [abstract] [Internet]. 1997 Available from: <a href="https://peerreviewcongress.org/abstracts_1997.html#thr">https://peerreviewcongress.org/abstracts_1997.html#thr</a> | <b>No tool of interest</b><br>(Number of weaknesses oppositely introduced by the editors)          |
| 13. Green SM, Callaham ML. Implementation of a journal peer reviewer stratification system based on quality and reliability. <i>Annals of emergency medicine</i> . 2011;57(2):149-52.                                                                                                                                                         | <b>No tool of interest</b><br>(Peer Reviewer Stratification System)                                |
| 14. Groves T. Best practice in peer review and editing,                                                                                                                                                                                                                                                                                       | <b>No tool involved</b>                                                                            |

|                                                                                                                                                                                                                                                                                                                  |                                                                                       |
|------------------------------------------------------------------------------------------------------------------------------------------------------------------------------------------------------------------------------------------------------------------------------------------------------------------|---------------------------------------------------------------------------------------|
| ensuring article quality. Notfall und Rettungsmedizin. 2010;13(1):6-8.                                                                                                                                                                                                                                           |                                                                                       |
| 15. Helton M, Balistreri W. Assessment of reviewers recommended by authors vs editors: is there bias? (abstract) [Internet]. 2009 Available from: <a href="https://peerreviewcongress.org/abstracts_2009.html#81">https://peerreviewcongress.org/abstracts_2009.html#81</a>                                      | <b>No outcome of interest</b>                                                         |
| 16. Hwang K, Hwang SH. Is Double-Blinded Peer Review Necessary? The Effect of Blinding on Review Quality. Plastic and reconstructive surgery. 2016;138(1):161e-2e.                                                                                                                                               | <b>No tool involved</b>                                                               |
| 17. Jadad AR, Moore RA, Carroll D, Jenkinson C, Reynolds DJ, Gavaghan DJ, McQuay HJ. Assessing the quality of reports of randomized clinical trials: is blinding necessary?. Controlled clinical trials. 1996;17(1):1-2.                                                                                         | <b>No tool of interest</b><br>(Assessment of RCTs report)                             |
| 18. Janke KK, Bzowickyj AS, Traynor AP. Editors' perspectives on enhancing manuscript quality and editorial decisions through peer review and reviewer development. American Journal of Pharmaceutical Education. 2017;81(4):73.                                                                                 | <b>No outcome of interest</b><br>(Manuscript quality)                                 |
| 19. Jurkat-Rott K, Lehmann-Horn F. Reviewing in science requires quality criteria and professional reviewers. European journal of cell biology. 2004;83(3):93-5.                                                                                                                                                 | <b>No tool involved</b>                                                               |
| 20. Lee SS. How to be a great reviewer: an editor's view. Liver International. 2008;28(2):158-9.                                                                                                                                                                                                                 | <b>No tool involved</b>                                                               |
| 21. Marchionini G. Rating reviewers. Science. 2008;319(5868):1335-6.                                                                                                                                                                                                                                             | <b>No tool involved</b>                                                               |
| 22. McNutt R, Glass RM. Peer reviewer recommendations and ratings of manuscript quality for accepted and rejected manuscripts (abstract) [Internet]. 2001. Available from: <a href="https://peerreviewcongress.org/abstracts_2001.html#rejected">https://peerreviewcongress.org/abstracts_2001.html#rejected</a> | <b>No tool involved</b>                                                               |
| 23. Moore A. What's in a peer review report?. Bioessays. 2013;35(2):77-.                                                                                                                                                                                                                                         | <b>No tool involved</b>                                                               |
| 24. Okike K, Hug KT, Kocher MS, Leopold SS. Single-blind vs double-blind peer review in the setting of author prestige. JAMA. 2016;316(12):1315-6.                                                                                                                                                               | <b>No tool of interest</b><br>(Number of errors oppositely introduced by the editors) |
| 25. Open peer review is feasible and does not reduce quality of reviews. BMJ. 1999;318:d.                                                                                                                                                                                                                        | <b>Type of reference</b><br>(Part of the introductory page "This week in the BMJ")    |
| 26. Parikh L, Benner RS, Riggs TW, Chescheir NC. Factors influencing review quality and reviewer recommendation for a high-impact ob-gyn journal. Obstetrics and Gynecology. 2016;127:139S.                                                                                                                      | <b>No tool involved</b>                                                               |
| 27. Polak JF. The role of the manuscript reviewer in the peer review process. AJR. American journal of roentgenology. 1995;165(3):685-8.                                                                                                                                                                         | <b>No tool of interest</b><br>(Monitor reviewer's performance)                        |
| 28. Resnik DB, Elmore SA. Ensuring the Quality, Fairness, and Integrity of Journal Peer Review: A Possible Role of Editors. Science and engineering ethics. 2016;22(1):169-88.                                                                                                                                   | <b>No tool involved</b>                                                               |
| 29. Richards D. Little evidence to support the use of editorial peer review to ensure quality of published research. Evidence-based dentistry. 2007;8(3):88-9.                                                                                                                                                   | <b>No outcome of interest</b><br>(Manuscript quality)                                 |
| 30. Rogers LF. Peer reviewers: reviewing manuscripts for the AJR. (editorial) AJR 2002;178(5):1051-1052                                                                                                                                                                                                          | <b>No tool of interest</b><br>(Assessment of manuscript)                              |
| 31. Shauver MJ, Chung KC. Reply: Is Double-Blinded Peer Review Necessary? The Effect of Blinding on Review Quality. Plastic and reconstructive surgery. 2016;138(1):162e-3e.                                                                                                                                     | <b>No tool involved</b>                                                               |
| 32. Silobričić V. Relative scales and their possible use in                                                                                                                                                                                                                                                      | <b>No tool of interest</b>                                                            |

|                                                                                                                                        |                                                                        |
|----------------------------------------------------------------------------------------------------------------------------------------|------------------------------------------------------------------------|
| evaluation of scientific research in a small scientific community. Acta Medica Croatica. 2004;58(3):173-6.                             | (Assessment of manuscript)                                             |
| 33. Szekely T, Kruger O, Krause ET. Errors in science: the role of reviewers. Trends in ecology & evolution. 2014;29(7):371-3.         | <b>No tool involved</b>                                                |
| 34. Tonks A. Reviewers chosen by authors. May be better than reviewers chosen by editors. British Medical Journal. 1995;311(6999):210. | <b>No tool of interest</b><br>(Evaluation of journal's review process) |

\*In alphabetical order
