# Supplementary material for: Tools used to assess the quality of peer review reports: a methodological systematic review
Source: PubMed Central journal article supplement (PMC6402095; doi:10.1186/s12874-019-0688-x), 2019-03-06
Supplement: 12874_2019_688_MOESM4_ESM.pdf [file 12874_2019_688_MOESM4_ESM.pdf]

## Appendix 4. Classification of peer review report quality components

| Peer Review Report Quality Components                                                                                                                                                                                                                                                                                                                                                                                                                                                                                                                                                                                                                                                                                                                                | N. of tools |
|----------------------------------------------------------------------------------------------------------------------------------------------------------------------------------------------------------------------------------------------------------------------------------------------------------------------------------------------------------------------------------------------------------------------------------------------------------------------------------------------------------------------------------------------------------------------------------------------------------------------------------------------------------------------------------------------------------------------------------------------------------------------|-------------|
| <p><b>1. Relevance of the study</b></p> <ul style="list-style-type: none"> <li>• Did the reviewer discuss the importance of the research question? (1,2)</li> <li>• Importance of question: Did the reviewer pay appropriate attention to the importance of the research question? (3)</li> <li>• Did the reviewer give appropriate attention to the importance of the question? (4)</li> <li>• Usefulness of the study (5)</li> <li>• How well the review addressed the clinical or research importance of the study? (6)</li> <li>• Discussion: measures the merit of identifying and discussing the importance, implications or improvements of the research (7)</li> <li>• Theoretical framework (8,9)</li> <li>• Literature review/ references (8,9)</li> </ul> | 9           |
| <p><b>2. Originality of the study</b></p> <ul style="list-style-type: none"> <li>• Did the reviewer discuss the originality of the paper? (1,2)</li> <li>• Problem statement/originality (8,9)</li> <li>• Originality of manuscripts (5)</li> </ul>                                                                                                                                                                                                                                                                                                                                                                                                                                                                                                                  | 5           |
| <p><b>3. Interpretation of the results</b></p> <ul style="list-style-type: none"> <li>• Did the reviewer comment on the author's interpretation of the results? (1,2)</li> <li>• The reviewer commented accurately and productively on the quality of the author's interpretation of the data, including acknowledgment of the data's limitations (10)</li> <li>• Discussion/ Interpretation of results (8,9)</li> <li>• Interpretation of results (5)</li> </ul>                                                                                                                                                                                                                                                                                                    | 6           |
| <p><b>4. Strengths and weaknesses of the study</b></p>                                                                                                                                                                                                                                                                                                                                                                                                                                                                                                                                                                                                                                                                                                               |             |
| <p>4.1 General</p> <ul style="list-style-type: none"> <li>• Comments enhance the merits and relevance of the work (11)</li> <li>• Strong and weak points (5)</li> <li>• How well it identified the study's strengths and weaknesses? (6)</li> <li>• Merits: measures how accurate and justified the review is in identifying manuscript strengths (7)</li> <li>• Critique: measures how accurate the and justified the review is in identifying manuscript weaknesses (7)</li> <li>• Shortcomings identified (12)</li> <li>• Target key issues: Did the reviewer concisely identify the key issues that either make or break the manuscript (from the editor's perspective)? (3)</li> <li>• Did the reviewer target key issues? (4)</li> </ul>                       | 7           |

|                                                                                                                                                                                                                                                                                                                                                                                                                                                                                                                                                                                                                                                                                                                                                                                                                                      |   |
|--------------------------------------------------------------------------------------------------------------------------------------------------------------------------------------------------------------------------------------------------------------------------------------------------------------------------------------------------------------------------------------------------------------------------------------------------------------------------------------------------------------------------------------------------------------------------------------------------------------------------------------------------------------------------------------------------------------------------------------------------------------------------------------------------------------------------------------|---|
| <p>4.2 Methods</p> <ul style="list-style-type: none"> <li>• Did the reviewer clearly identify the strengths and weaknesses of the methods (study design, data collection and data analysis)? (1,2)</li> <li>• The reviewer identified and commented on major strengths and weaknesses of study design and methods (10)</li> <li>• Methods: Did the reviewers clearly identify the strengths and weaknesses of the a. study design; b. data collection and c. data analysis (3)</li> <li>• Did the reviewer clearly identify strengths and weaknesses in the study's methods? (4)</li> <li>• Design/methods (8,9)</li> </ul>                                                                                                                                                                                                          | 7 |
| <p>4.3 Statistical methods</p> <ul style="list-style-type: none"> <li>• Persons (9)</li> <li>• Occasions (9)</li> <li>• Variables and measurement (9)</li> <li>• Procedure (9)</li> <li>• Data quality (9)</li> <li>• Model/estimator/assumptions (9)</li> <li>• Confidence intervals/p-values/overall fit (9)</li> <li>• Statistical interpretation (9)</li> <li>• Tables (9)</li> <li>• Graphs (9)</li> </ul>                                                                                                                                                                                                                                                                                                                                                                                                                      | 1 |
| <p><b>5. Presentation and organization of the manuscript</b></p> <ul style="list-style-type: none"> <li>• Did the reviewer make specific useful comments on the writing, organisation, tables and figures of the manuscript? (1,2)</li> <li>• The reviewer commented on mayor strengths and weaknesses of the manuscript as a written communication, independent of the design, methods, results, and interpretation of the study (10)</li> <li>• Presentation: Are there any constructive suggestions on improvement of a. writing; b. data presentation and c. interpretation (3)</li> <li>• Did the reviewer make constructive comments about the quality of writing and presentation of data? (4)</li> <li>• Data analysis/Presentation (8,9)</li> <li>• Organization/writing (8,9)</li> <li>• Tables and figures (5)</li> </ul> | 8 |
| <p><b>6. Structure of reviewer's comments</b></p> <ul style="list-style-type: none"> <li>• Sophisticated detailed comments to the author by section with line and page references (11)</li> <li>• Concise well-organized comments to the editor (11)</li> <li>• Section-by-section review (13)</li> <li>• Structure (14)</li> <li>• Consistent with journal's review criteria (12)</li> </ul>                                                                                                                                                                                                                                                                                                                                                                                                                                        | 4 |
| <p><b>7. Characteristics of reviewers' comments</b></p> <p>7.1 Clarity</p> <ul style="list-style-type: none"> <li>• Clear (8,9)</li> <li>• How clear was this review? The review was easily read and interpreted by the editor and authors (17)</li> </ul>                                                                                                                                                                                                                                                                                                                                                                                                                                                                                                                                                                           | 3 |

|                                                                                                                                                                                                                                                                                                                                                                                                                                                                                                                                                                                                                                                                                                                                                                                                                           |    |
|---------------------------------------------------------------------------------------------------------------------------------------------------------------------------------------------------------------------------------------------------------------------------------------------------------------------------------------------------------------------------------------------------------------------------------------------------------------------------------------------------------------------------------------------------------------------------------------------------------------------------------------------------------------------------------------------------------------------------------------------------------------------------------------------------------------------------|----|
| <p>7.2 Constructiveness</p> <ul style="list-style-type: none"> <li>• Were the reviewer's comments constructive? (1,2)</li> <li>• The reviewer's comments to author were constructive and professional (10)</li> <li>• Constructive (3,8,9)</li> <li>• Constructiveness (4,14)</li> <li>• How helpful was this review? Comments were constructive, relevant, and realistic (17)</li> </ul>                                                                                                                                                                                                                                                                                                                                                                                                                                 | 9  |
| <p>7.3 Detail/ Thoroughness</p> <ul style="list-style-type: none"> <li>• The amount of detail (16)</li> <li>• Level of sophistication of the commentary (16)</li> <li>• Detail of commentary (12)</li> <li>• General: Was the reviewer a. thorough (3)</li> <li>• Thoroughness (4)</li> <li>• Precise (8,9)</li> <li>• How thorough was this review? The review gave adequate consideration to all aspects of the paper including methodology, figures, interpretation and presentation of results, ethics, relevance, etc. (17)</li> <li>• Did the reviewer supply appropriate evidence using examples from the paper to substantiate their comments? (1,2)</li> <li>• Offering supporting references (13)</li> <li>• Did reviewers supply evidence to support their statements? (6)</li> <li>• Logical (8,9)</li> </ul> | 11 |
| <p>7.4 Fairness</p> <ul style="list-style-type: none"> <li>• Fair (3)</li> <li>• Fairness (4)</li> <li>• Balanced/fair (8,9)</li> <li>• Objectivity (14)</li> </ul>                                                                                                                                                                                                                                                                                                                                                                                                                                                                                                                                                                                                                                                       | 5  |
| <p>7.5 Knowledgeable</p> <ul style="list-style-type: none"> <li>• Knowledgeable (3)</li> <li>• Knowledge of the manuscript's content area (4)</li> <li>• Knowledgeable/substantiated (8,9)</li> <li>• Understands content (12)</li> </ul>                                                                                                                                                                                                                                                                                                                                                                                                                                                                                                                                                                                 | 5  |
| <p>7.6 Tone</p> <ul style="list-style-type: none"> <li>• How would you rate the tone of the review? (2)</li> <li>• Etiquette (13)</li> <li>• Courteous (3)</li> <li>• Courteousness (4)</li> <li>• Overall tone of the reviewers was also assessed as harsh or courteous (5)</li> <li>• Were reviewers courteous? (6)</li> <li>• Constructive tone (12)</li> </ul>                                                                                                                                                                                                                                                                                                                                                                                                                                                        | 7  |
| <p><b>8. Timeliness of the review report</b></p> <ul style="list-style-type: none"> <li>• Timely (14 days) or early review completion (11)</li> <li>• Timeliness (13)</li> <li>• Aspect: Timeliness (15)</li> <li>• Punctuality of the review (16)</li> <li>• Turnaround time (14)</li> <li>• How timely was this review? The review assignment was completed within the time limits established by the editor (17)</li> <li>• Time taken to review (&lt;4 weeks) (18)</li> </ul>                                                                                                                                                                                                                                                                                                                                         | 7  |
| <p><b>9. Usefulness of the review report</b></p> <p>9.1 Decision making</p> <ul style="list-style-type: none"> <li>• Grade sheet (13)</li> </ul>                                                                                                                                                                                                                                                                                                                                                                                                                                                                                                                                                                                                                                                                          | 6  |

|                                                                                                                                                                                                                                                                                                                                                                                                                                                                                                                                                                                                                                                                                                                                                                                                                                                                                                                        |   |
|------------------------------------------------------------------------------------------------------------------------------------------------------------------------------------------------------------------------------------------------------------------------------------------------------------------------------------------------------------------------------------------------------------------------------------------------------------------------------------------------------------------------------------------------------------------------------------------------------------------------------------------------------------------------------------------------------------------------------------------------------------------------------------------------------------------------------------------------------------------------------------------------------------------------|---|
| <ul style="list-style-type: none"> <li>• Summary and/or recommendation (13)</li> <li>• The reviewer provided the editor with the proper context and perspective to make a decision about acceptance or revision of the manuscript (10)</li> <li>• Summary grade (4)</li> <li>• Aspect: Helpfulness for Decision (weight 27): This aspect should be evaluated regardless of how useful the review will be as feedback to the authors (15)</li> <li>• Usefulness to editor (8,9)</li> </ul>                                                                                                                                                                                                                                                                                                                                                                                                                              |   |
| <p>9.2 Manuscript improvement</p> <ul style="list-style-type: none"> <li>• Aspect: Helpfulness for Authors (weight 19): This aspect is solely interested in how well the review aids the authors for improving their work and/or writing. Whether the review makes a good judgment regarding acceptance of the submission plays no role here whatsoever (15)</li> <li>• Perceived Usefulness to authors (8,9)</li> <li>• ≥ 300 words or more than 4 suggestions for improvement (18)</li> <li>• Suggestions to correct errors (18)</li> <li>• Specific errors identified (18)</li> <li>• Better references (18)</li> <li>• The reviewer provided the author with useful suggestions for improvement of the manuscript (10)</li> <li>• The quality of the suggestions for manuscript improvement (16)</li> <li>• Specific suggestions (12)</li> <li>• Insight (14)</li> <li>• New insights/perspectives (13)</li> </ul> | 9 |

## References

1. Black N, Van Rooyen S, Godlee F, Smith R, Evans S. What makes a good reviewer and a good review for a general medical journal? *JAMA*. 1998;280(3):231–3.
2. Van Rooyen S, Godlee F, Evans S, Black N, Smith R. Effect of open peer review on quality of reviews and on reviewers' recommendations: a randomised trial. *BMJ*. 1999;318(7175):23–7.
3. Das Sinha S., Sahni P, Nundy S. Does exchanging comments of Indian and non-Indian reviewers improve the quality of manuscript reviews? *Natl Med J India*. 1999;12(5):210–3.
4. McNutt RA, Evans AT, Fletcher RH, Fletcher SW. The Effects of Blinding on the Quality of Peer Review. *JAMA*. 1990;263(10):1371–6.
5. Jawaid SA, Jawaid M, Jafary MH. Characteristics of reviewers and quality of reviews: A retrospective study of reviewers at Pakistan Journal of Medical Sciences. *Pakistan J Med Sci*. 2006;22(2):101–6.
6. Justice AC, Cho MK, Winker MA, Berlin JA. Does Masking Author Identity Improve Peer Review Quality? A Randomized Controlled Trial. *JAMA*. 1998;280(3):240–2.
7. Hettyey A, Griggio M, Mann M, Raveh S, Schaedelin FC, Thonhauser KE, et al. Peerage of Science: Will it work? *Trends Ecol Evol*. 2012;27(4):189–90.
8. Henly SJ, Dougherty MC. Quality of manuscript reviews in nursing research. *Nurs Outlook*. 2009;57(1):18–26.
9. Henly SJ, Bennett JA, Dougherty MC. Scientific and statistical reviews of manuscripts submitted to Nursing Research: Comparison of completeness, quality, and usefulness. *Nurs Outlook*. 2010;58(4):188–99.

10. Callaham M, Knopp R, John Gallagher E. Effect of written feedback by editors on quality of reviews: Two randomized trials. *JAMA*. 2002;287(21):2781–3.
11. Berquist T. Improving your reviewer score: It's not that difficult. *AJR*. 2017;209(4):711–2.
12. Shattell MM, Chinn P, Thomas SP, Cowling WR. Authors' and Editors' Perspectives on Peer Review Quality in Three Scholarly Nursing Journals. *J Nurs Scholarsh*. 2010;42(1):58–65.
13. Feurer I, Becker G, Picus D, Ramirez E, Darcy M, Hicks M. Evaluating peer reviews: Pilot testing of a grading instrument. *JAMA*. 1994;272(2):98–100.
14. Landkroon AP, Euser AM, Veeken H. Quality Assessment of Reviewers' Reports Using a Simple Instrument. *Obstet Gynecol*. 2006;108(4):979–85.
15. Prechelt L. Review Quality Collector [Internet]. Available from: <https://reviewqualitycollector.org/static/pdf/rqdef-example.pdf>
16. Kliewer MA, Freed KS, DeLong DM, Pickhardt PJ, Provenzale JM. Reviewing the reviewers: Comparison of review quality and reviewer characteristics at the American Journal of Roentgenology. *AJR*. 2005;184(6):1731–5.
17. Publons. Publons for Editors: Overview [Internet]. Available from: <https://static1.squarespace.com/static/576fcda2e4fcb5ab5152b4d8/t/58e21609d482e9ebf98163be/14912117>
18. Yang Y. Effects of Training Reviewers on Quality of Peer Review: A Before-and-After Study (Abstract) [Internet]. 2009. Available from: [https://peerreviewcongress.org/abstracts\\_2009.html](https://peerreviewcongress.org/abstracts_2009.html)
